# Supplementary material
Source: PubMed Central journal article supplement (PMC6816734)
Supplement: 12195_2016_470_MOESM4_ESM.pdf [file 12195_2016_470_MOESM4_ESM.pdf]

Navier-stokes equation:

$$\rho \frac{\partial u}{\partial t} = -\nabla P + \nabla \cdot (\mu(\nabla u + \nabla u^T)) \quad (1)$$

$$\mu = \lambda |\dot{\gamma}|^{n-1} \quad (2)$$

shear rate is given as

$$\dot{\gamma} = \frac{1}{2} [\nabla u + (\nabla u)^T] \quad (3)$$

The area encompassing the ladder wall surface is represented as  $\Theta$  and the velocity of particle  $i$  at time  $t$  is given as:

$$v_p(i, t) = v_p(i, t-1) + \frac{F_d(i, t)}{m_p} \quad \forall i \notin \Theta \quad (4)$$

$$v_p(i, t) = 0 \quad \forall i \in \Theta \quad (5)$$

Drag force on particle  $i$  at time  $t$  is given as:

$$F_d(i, t) = \frac{18\mu}{\rho_p d_p^2} m_p [v_p(i, t) - u(x, y, t)] \quad (6)$$

Assumptions: (i) Particle interactions with the wall were assumed to result in zero velocity as shown in Eqn. 5, (ii) Particle-particle interactions were not modeled, (iii) Flow induced thrombus is modeled as discrete evolution with sequential changes in geometry as shown below.

*Flow induced thrombus formation algorithm:*

The over all microfluidic ladder network area ( $\bar{\Xi}$ ) is segmented into several squares of a side equal to  $10\mu m$ . Shear rate ( $\dot{\gamma}$ ), platelet number ( $n_p$ ), thrombin concentration ( $\dot{T}h$ ) are calculated in this segmented regions to predict thrombus nucleation and growth in the following steps.

Step 1: Predict the area of maximum shear rate ( $\bar{\Theta}$ ) in the ladder device

$$\bar{\Theta} = \max \{\dot{\gamma}(\Xi)\} \quad \forall \Xi \in \bar{\Xi} \quad (7)$$

Step 2: Predict the region with maximum number of platelet particles ( $\Gamma$ )

$$\Gamma = \max \{n_p(\Xi)\} \quad \forall \Xi \in \bar{\Xi} \quad (8)$$

Step 3: Prediction of high probability thrombus nucleation area ( $\Pi$ ) in the ladder network

$$\Pi = \bar{\Theta} \cap \Gamma \quad (9)$$

Step 4: Based on the nucleation sites the geometry is modified with clots of 5% occlusion and these clots act as source of thrombin generation. The maximum thrombin concentration ( $\dot{T}h$ ) in the ladder network is given as follows:

$$\dot{T}h = \max \{C_i(\Xi)\} \quad \forall \Xi \in \bar{\Xi} \quad (10)$$

Step 5: Prediction of thrombus growth and propagation regions in ladder network ( $\bar{\Pi}$ )

$$\bar{\Pi} = (\bar{\Theta} \cap \Gamma) \cap \dot{T}h \quad (11)$$
